# Supplementary material for: Near-infrared light-responsive photothermal α-Fe2O3@Au/PDA core/shell nanostructure with on–off controllable anti-bacterial effects
Source: Royal Society of Chemistry journal article supplement (doi:10.1039/d1dt02251b), 2021-01-01
Supplement: d1dt02251b1.pdf [file d1dt02251b1.pdf]

## Supporting Information

### **Near - infrared light - responsive photothermal $\alpha$ -Fe<sub>2</sub>O<sub>3</sub>@Au/PDA core/shell nanostructure with on-off controllable anti-bacterial effect**

*Qingshan Xiong<sup>a</sup>, Qunling Fang<sup>a,\*</sup>, Kezhu Xu<sup>a</sup>, Guanghui Liu<sup>c</sup>, Min Sang<sup>b</sup>, Yunqi Xu<sup>b</sup>,  
Lingyun Hao<sup>d</sup>, Shouhu Xuan<sup>b,\*</sup>*

<sup>a</sup> School of Food and Biological Engineering, Key Laboratory of Metabolism and Regulation for Major Diseases of Anhui Higher Education Institutes, Hefei University of Technology, Hefei, 230009, PR China

<sup>b</sup> CAS Key Laboratory of Mechanical Behavior and Design of Materials, Department of Modern Mechanics, University of Science and Technology of China, Hefei 230027, PR China

<sup>c</sup> School of Energy, Materials and Chemical Engineering, Hefei University, 99 Jinxiu Avenue, Hefei, Anhui, 230601, PR China

<sup>d</sup> School of Materials Engineering, Jinling Institute of Technology, Nanjing 211169, PR China

\*Corresponding author:

Asso. Prof. Qunling Fang

E-mail: fql.good@hfut.edu.cn

Tel: 86-551-62904353

Fax: 86-551-62904353

Prof. Shouhu Xuan

E-mail: xuansh@ustc.edu.cn

Tel: 86-551-63601702

Fax: 86-551-63606382

### **1. Synthesis of $\alpha$ -Fe<sub>2</sub>O<sub>3</sub>@Au/PDA core-shell nanocube.**

Firstly, 10 mg  $\alpha$ -Fe<sub>2</sub>O<sub>3</sub> nanocubes was dispersed in 40 mL EtOH by ultrasonication, then HAuCl<sub>4</sub> (0.15M), trisodium citrate (10 mg) and 30 mL DA-HCl (17.5 mM) in Tris (pH = 8.5) were added to the mixed solution respectively. After sonication for 3 h, the product was obtained from the mixed solution using centrifugal separation and washed 3 times with deionized water and ethanol. At last, the final  $\alpha$ -Fe<sub>2</sub>O<sub>3</sub>@Au/PDA was vacuum dried at 45 °C for 12 h.

### **2. Preparation of the $\alpha$ -Fe<sub>2</sub>O<sub>3</sub>@PDA core/shell nanospindle.**

10 mg  $\alpha$ -Fe<sub>2</sub>O<sub>3</sub> was dispersed in 40 mL EtOH by ultrasonication, then 30 mL DA-HCl (17.5 mM) in Tris (pH = 8.5) were added to the mixed solution. After sonication for 6 h, the product was obtained from the mixed solution using centrifugal separation at 8000 rpm and washed 3 times with deionized water and ethanol. Finally, the  $\alpha$ -Fe<sub>2</sub>O<sub>3</sub>@PDA was vacuum dried at 45 °C for 12 h.

### **3. Fabrication of $\alpha$ -Fe<sub>2</sub>O<sub>3</sub>@Au/PDA@Au/PDA core-shell nanospindle.**

HAuCl<sub>4</sub> (0.15M), trisodium citrate (10 mg) and 30 mL DA-HCl (17.5 mM) in Tris (pH = 8.5) were added to the EtOH (40 mL) dispersed with 10 mg  $\alpha$ -Fe<sub>2</sub>O<sub>3</sub>@Au/PDA nanospindles, after sonication for 3 h, the solid particle was separated from the mixed solution by centrifugal separation at 8000 rpm and washed 3 times with deionized water and ethanol. Finally, the  $\alpha$ -Fe<sub>2</sub>O<sub>3</sub>@Au/PDA@Au/PDA was vacuum dried at 45 °C for 12 h.

### **4. The photothermal conversion efficiency of the $\alpha$ -Fe<sub>2</sub>O<sub>3</sub>@Au/PDA core/shell nanostructure**

The the scatter in black in Figure. 8d mean time data from the cooling period versus negative natural logarithm of driving force temperature which was obtained from the cooling process. The curve in red was used for calculating the time constants for heat transfer of the  $\alpha$ -Fe<sub>2</sub>O<sub>3</sub>@Au/PDA which were determined to be  $\tau_s = 311.69$ . The

photothermal conversion efficiency of the  $\alpha$ -Fe<sub>2</sub>O<sub>3</sub>@Au/PDA core/shell nanostructure was calculated according to the reported method.<sup>1</sup> The  $\eta$  value was calculated by the following formula:

$$\eta = \frac{-hS(T_{max} - T_{Surr}) - Q_S}{I(1 - 10^{-A_{808}})} \times 100\%$$

$h$  and  $S$  were the heat transfer coefficient and the surface area of the sample container respectively;  $T_{max}$  and  $T_{Surr}$  were the equilibrium temperature and the ambient temperature of the surroundings;  $Q_S$  was expressed as the heat associated with the light absorbance,  $I$  was the laser power and  $A_{808}$  was the absorbance of the sample at 808 nm.

### References

1. W.-N. Wang, C.-Y. Zhang, M.-F. Zhang, P. Pei, W. Zhou, Z.-B. Zha, M. Shao and H.-S. Qian, *Chem. Eng. J.*, 2020, **381**, 125488.

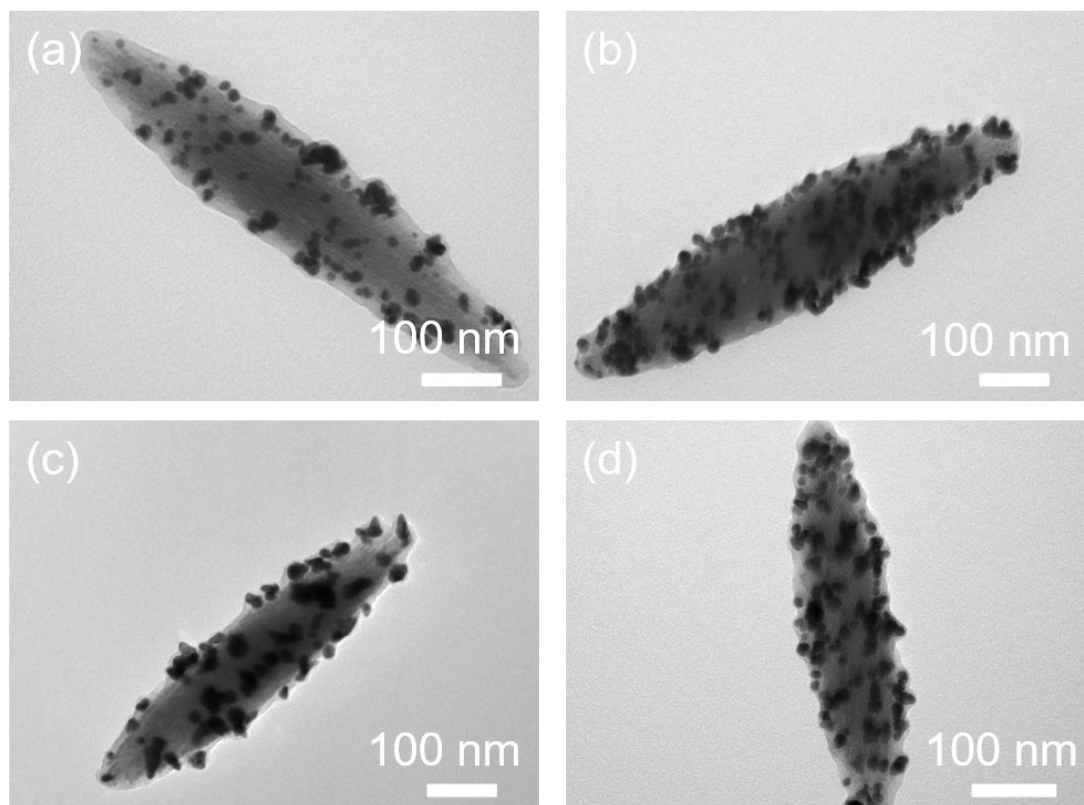

**Figure S1.** TEM images of  $\alpha$ -Fe<sub>2</sub>O<sub>3</sub>@Au/PDA nanospindle prepared under the same

conditions of DA (30 mg), with different concentrations of H<sub>AuCl</sub><sub>4</sub>:  $4.8 \times 10^{-5}$  M (a),  $7.2 \times 10^{-5}$  M (b),  $9.6 \times 10^{-5}$  M (c), and  $1.2 \times 10^{-4}$  M (d).

| Concentrations of H <sub>AuCl</sub> <sub>4</sub> (M) | Au wt% |
|------------------------------------------------------|--------|
| $4.8 \times 10^{-5}$                                 | 7.8    |
| $7.2 \times 10^{-5}$                                 | 12.0   |
| $9.6 \times 10^{-5}$                                 | 14.3   |
| $1.2 \times 10^{-4}$                                 | 17.6   |

**Table S1.** The percent of Au in  $\alpha$ -Fe<sub>2</sub>O<sub>3</sub>@Au@PDA with different concentrations of H<sub>AuCl</sub><sub>4</sub>.

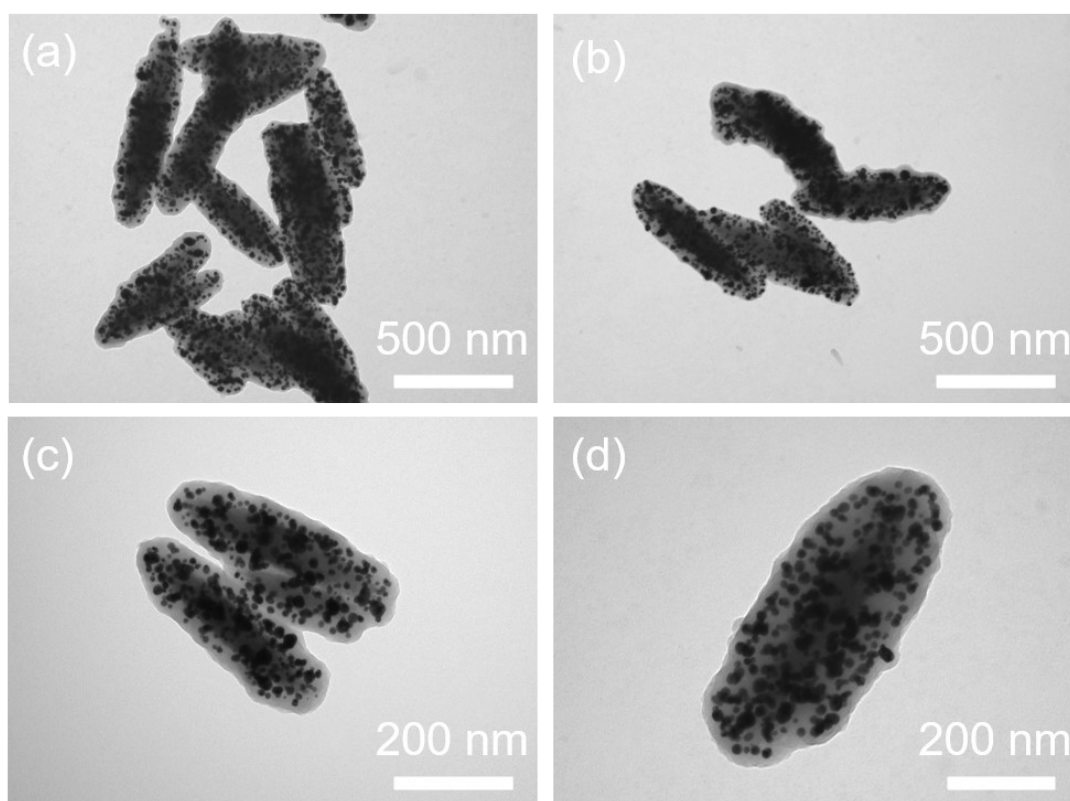

**Figure S2.** TEM images of spindle  $\alpha$ -Fe<sub>2</sub>O<sub>3</sub>@Au/PDA@Au/PDA prepared with  $2.4 \times 10^{-4}$  M H<sub>AuCl</sub><sub>4</sub> and 120 mg PDA.

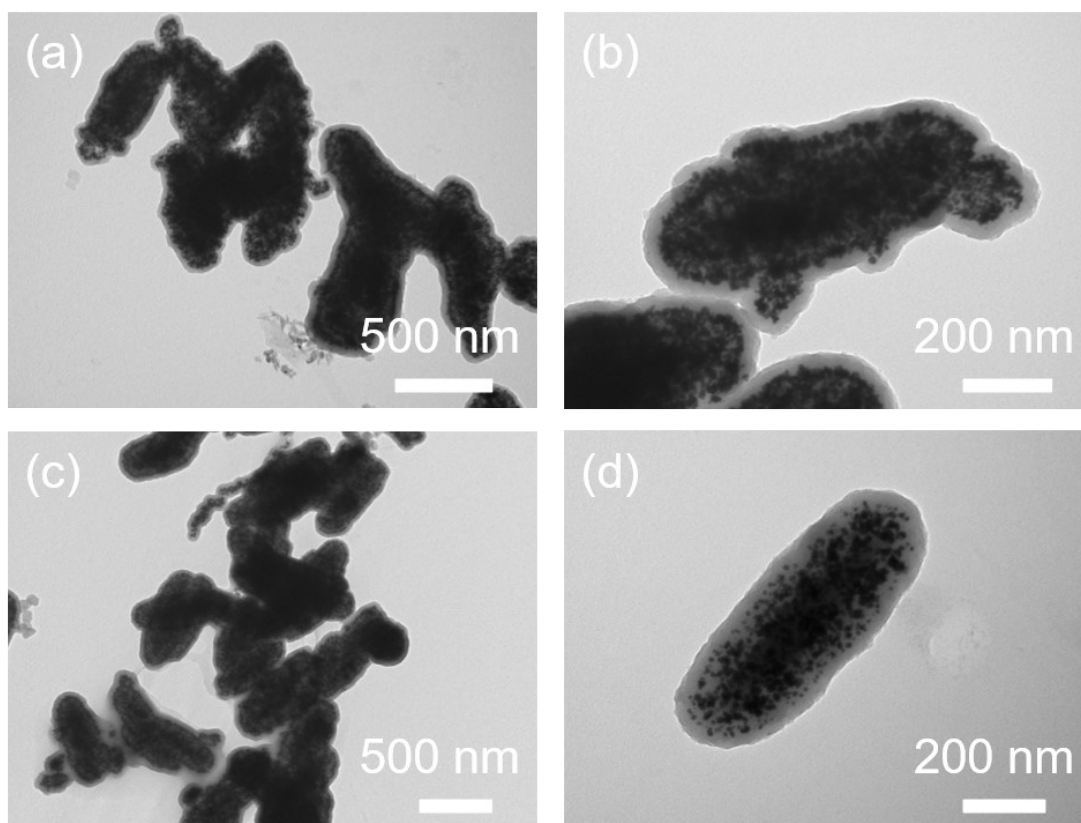

**Figure S3.** TEM images of spindle  $\alpha\text{-Fe}_2\text{O}_3@Au/PDA@Au/PDA@Au/PDA$  prepared with  $3.6 \times 10^{-5}$  M  $\text{HAuCl}_4$  and 180 mg PDA.

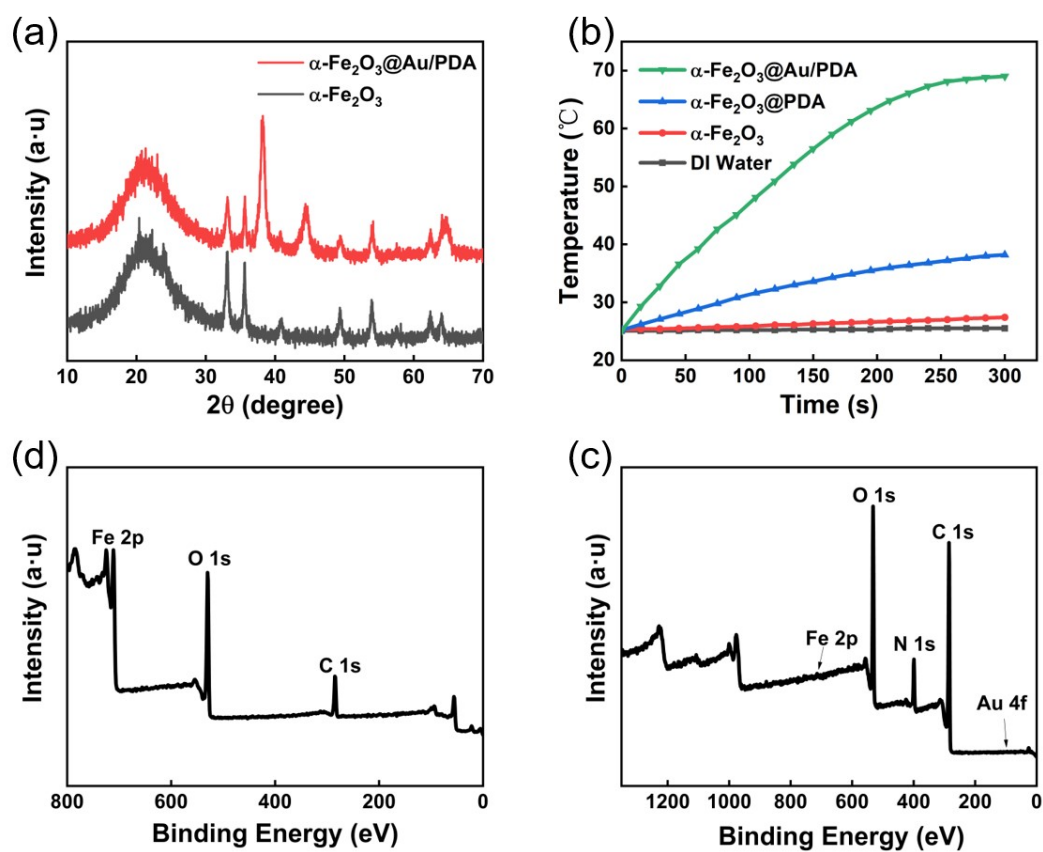

**Figure S4.** XRD diffraction patterns (a), temperature elevation curves of DI water, cubic  $\alpha\text{-Fe}_2\text{O}_3$  (50  $\mu\text{g/mL}$ ), cubic  $\alpha\text{-Fe}_2\text{O}_3\text{@PDA}$  (50  $\mu\text{g/mL}$ ), cubic  $\alpha\text{-Fe}_2\text{O}_3\text{@Au/PDA}$  (50  $\mu\text{g/mL}$ ), under NIR laser irradiation (808 nm, 2.0 W  $\text{cm}^{-2}$ ) (b), and X-ray photoelectron spectroscopy (XPS) spectra of  $\alpha\text{-Fe}_2\text{O}_3$  (c) and  $\alpha\text{-Fe}_2\text{O}_3\text{@Au/PDA}$  (d) nanocubes.

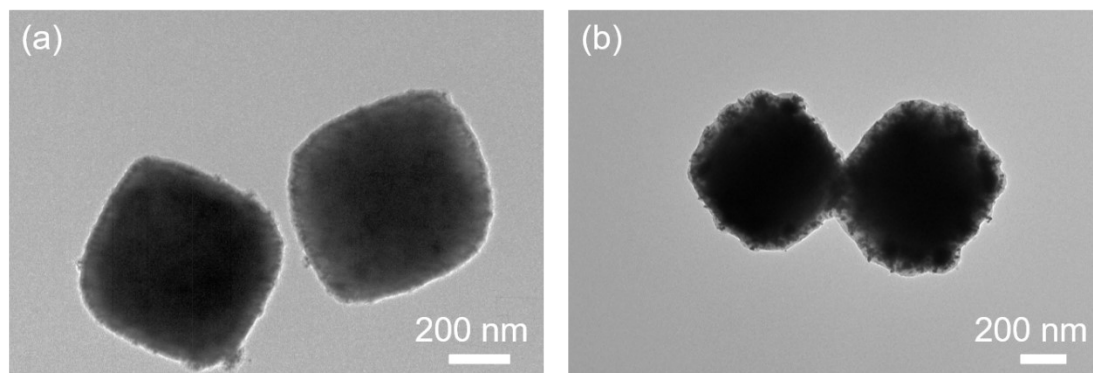

**Figure S5.** TEM images of cube  $\alpha\text{-Fe}_2\text{O}_3\text{@Au/PDA}$  prepared with  $7.2 \times 10^{-5}$  M  $\text{HAuCl}_4$  and 60 mg PDA (a),  $1.2 \times 10^{-4}$  M  $\text{HAuCl}_4$  and 100 mg PDA (b).

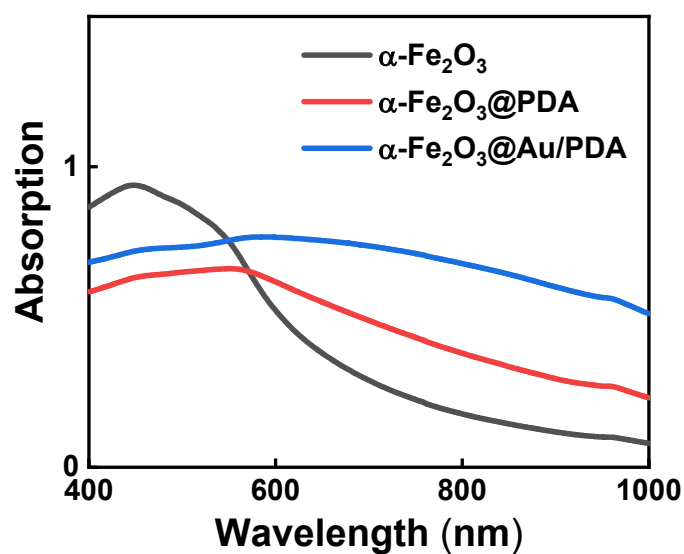

**Figure S6.** The UV-vis spectra of spindle-like  $\alpha\text{-Fe}_2\text{O}_3$ ,  $\alpha\text{-Fe}_2\text{O}_3\text{@PDA}$  and  $\alpha\text{-Fe}_2\text{O}_3\text{@Au@PDA}$ .

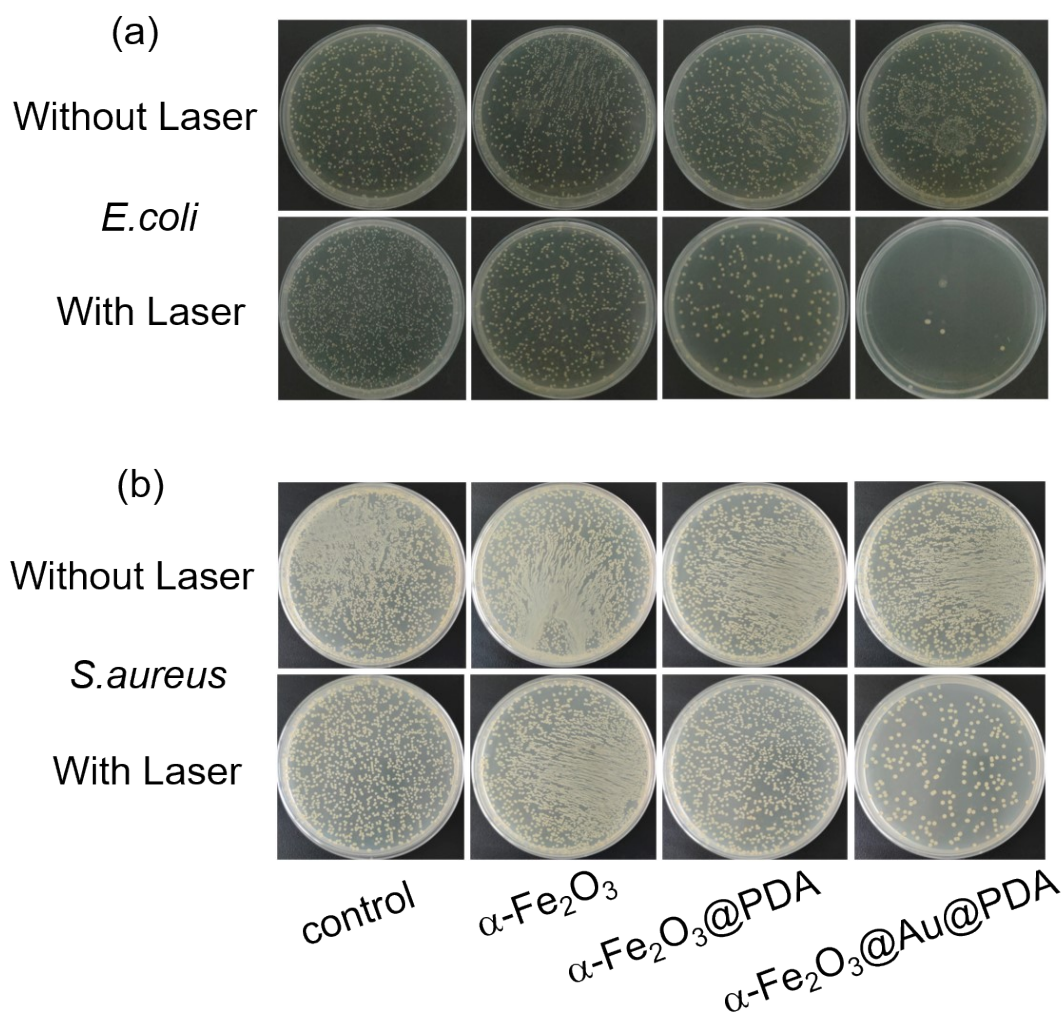

**Figure S7.** Photographs of colonies of *E. coli* and *S. aureus* incubated with DI water,  $\alpha\text{-Fe}_2\text{O}_3$  nanocube,  $\alpha\text{-Fe}_2\text{O}_3\text{@PDA}$  nanocube, and  $\alpha\text{-Fe}_2\text{O}_3\text{@Au/PDA}$  nanocube (50  $\mu\text{g/mL}$ ) with/without 808 nm laser irradiation for 5 min.

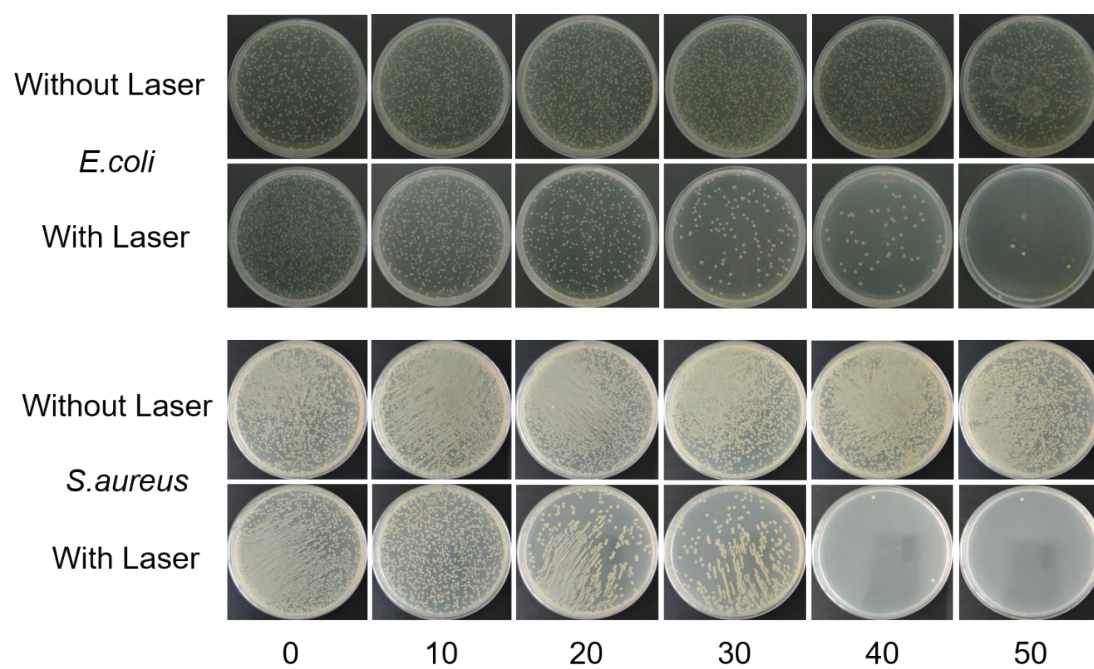

**Figure S8.** Photographs of colonies of *E. coli* and *S. aureus* incubated with various concentrations (0, 10, 20, 30, 40 and 50  $\mu\text{g/mL}$ ) of  $\alpha\text{-Fe}_2\text{O}_3\text{@Au/PDA}$  nanocubes with/without 808 nm laser irradiation for 5 min.
